# Supplementary material
Source: PubMed Central journal article supplement (PMC8475722)

# Figure S1

## A Surgically resected tumors and paired normal adjacent tissues (NATs)

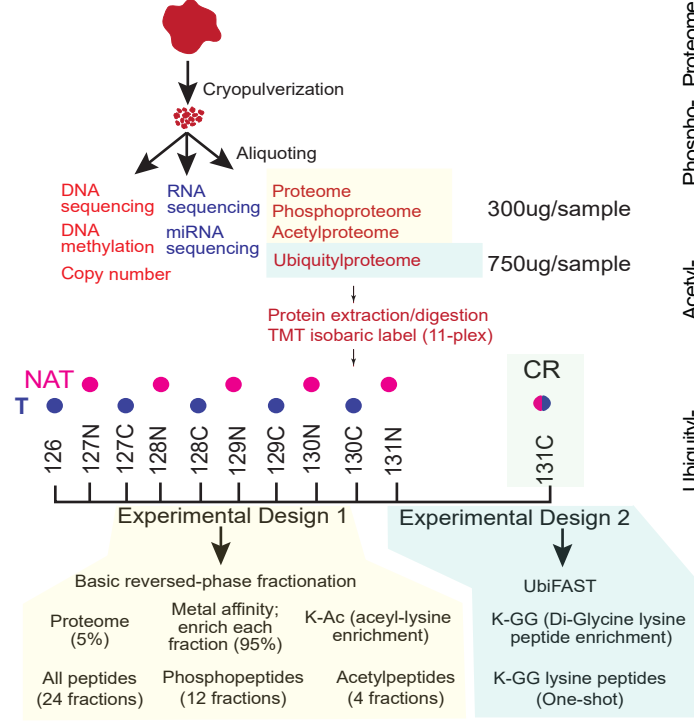

## B Number of features per plex and deviation from median

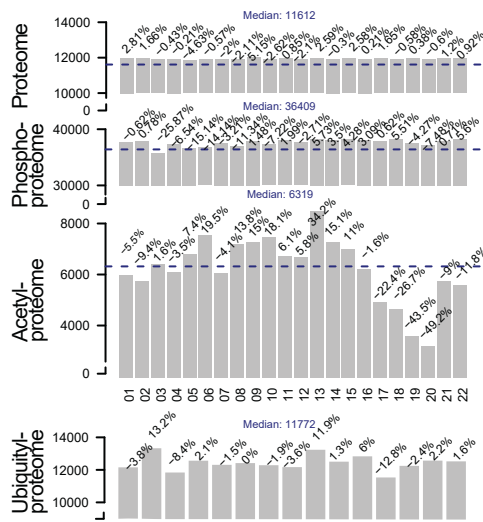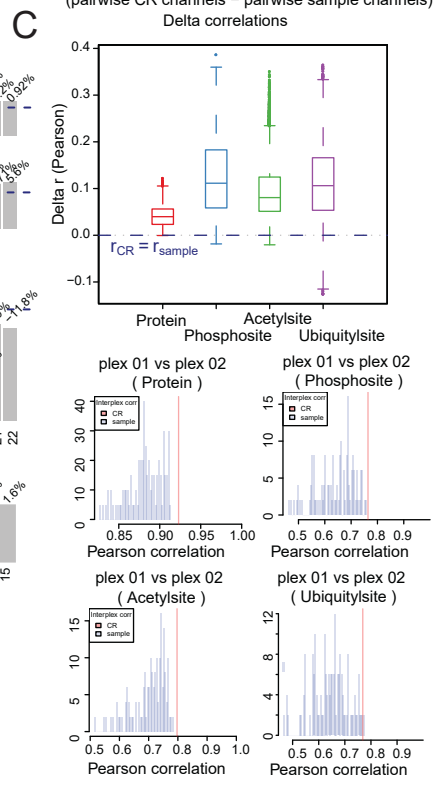

## D Smoker (81) Never-smoker (16) Unknown (13)

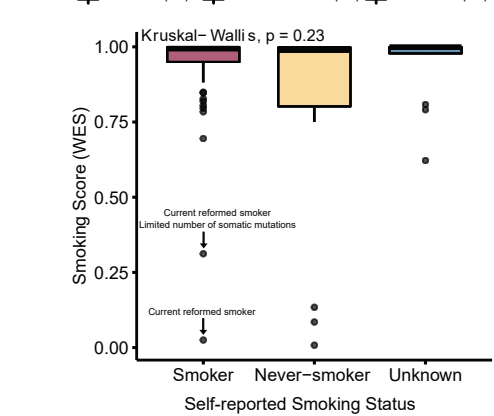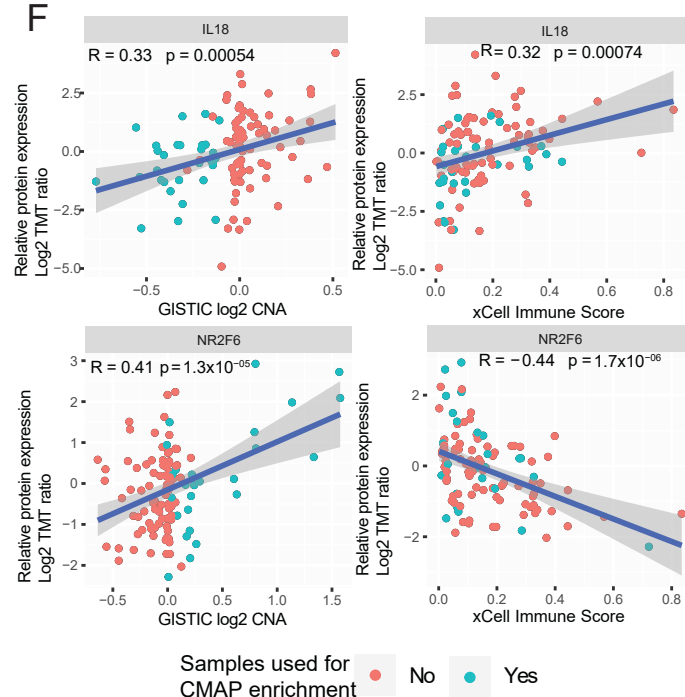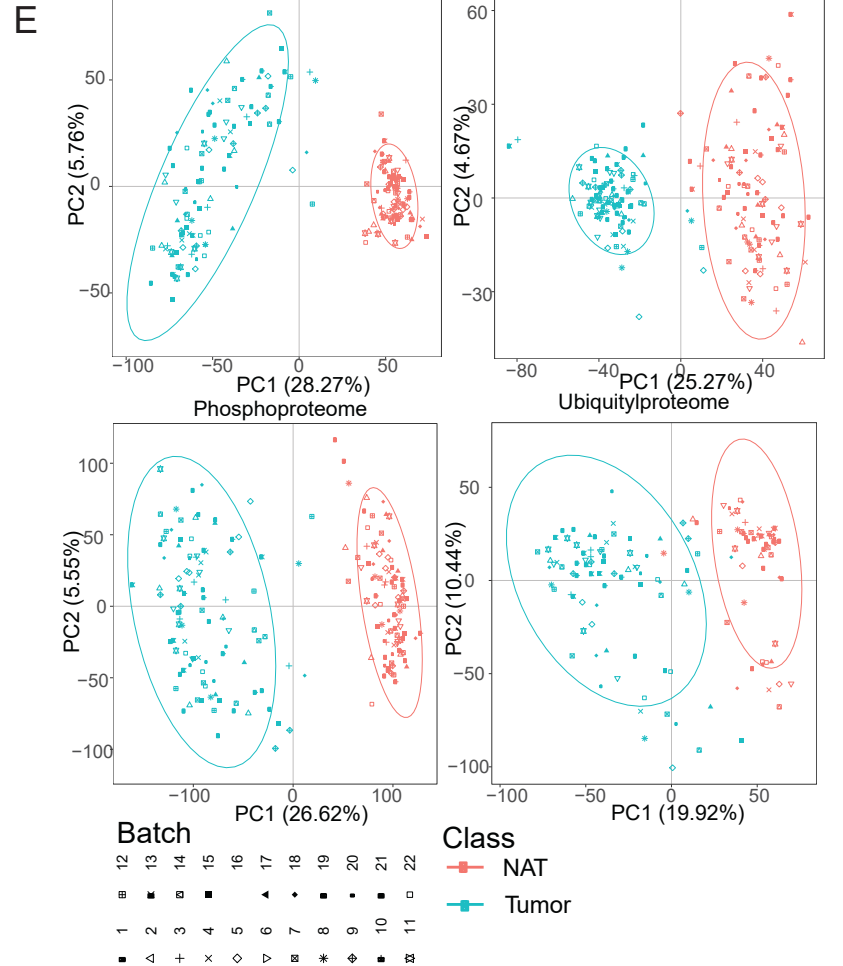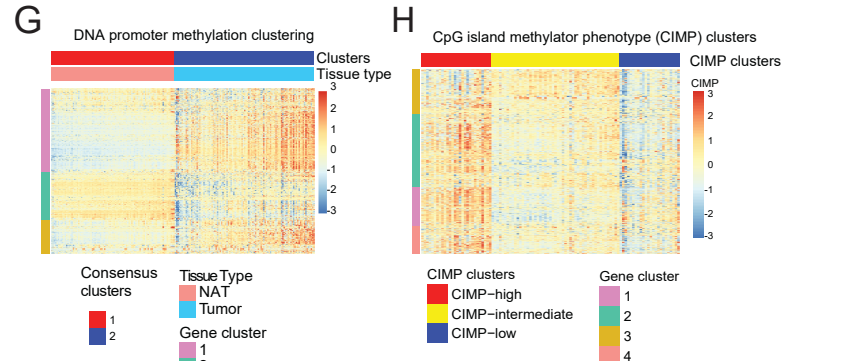

Supplement: NIHMS1730863-supplement-1.pdf [file NIHMS1730863-supplement-1.pdf]
