# Supplementary material
Source: PubMed Central journal article supplement (PMC8475722)

**Figure S3**

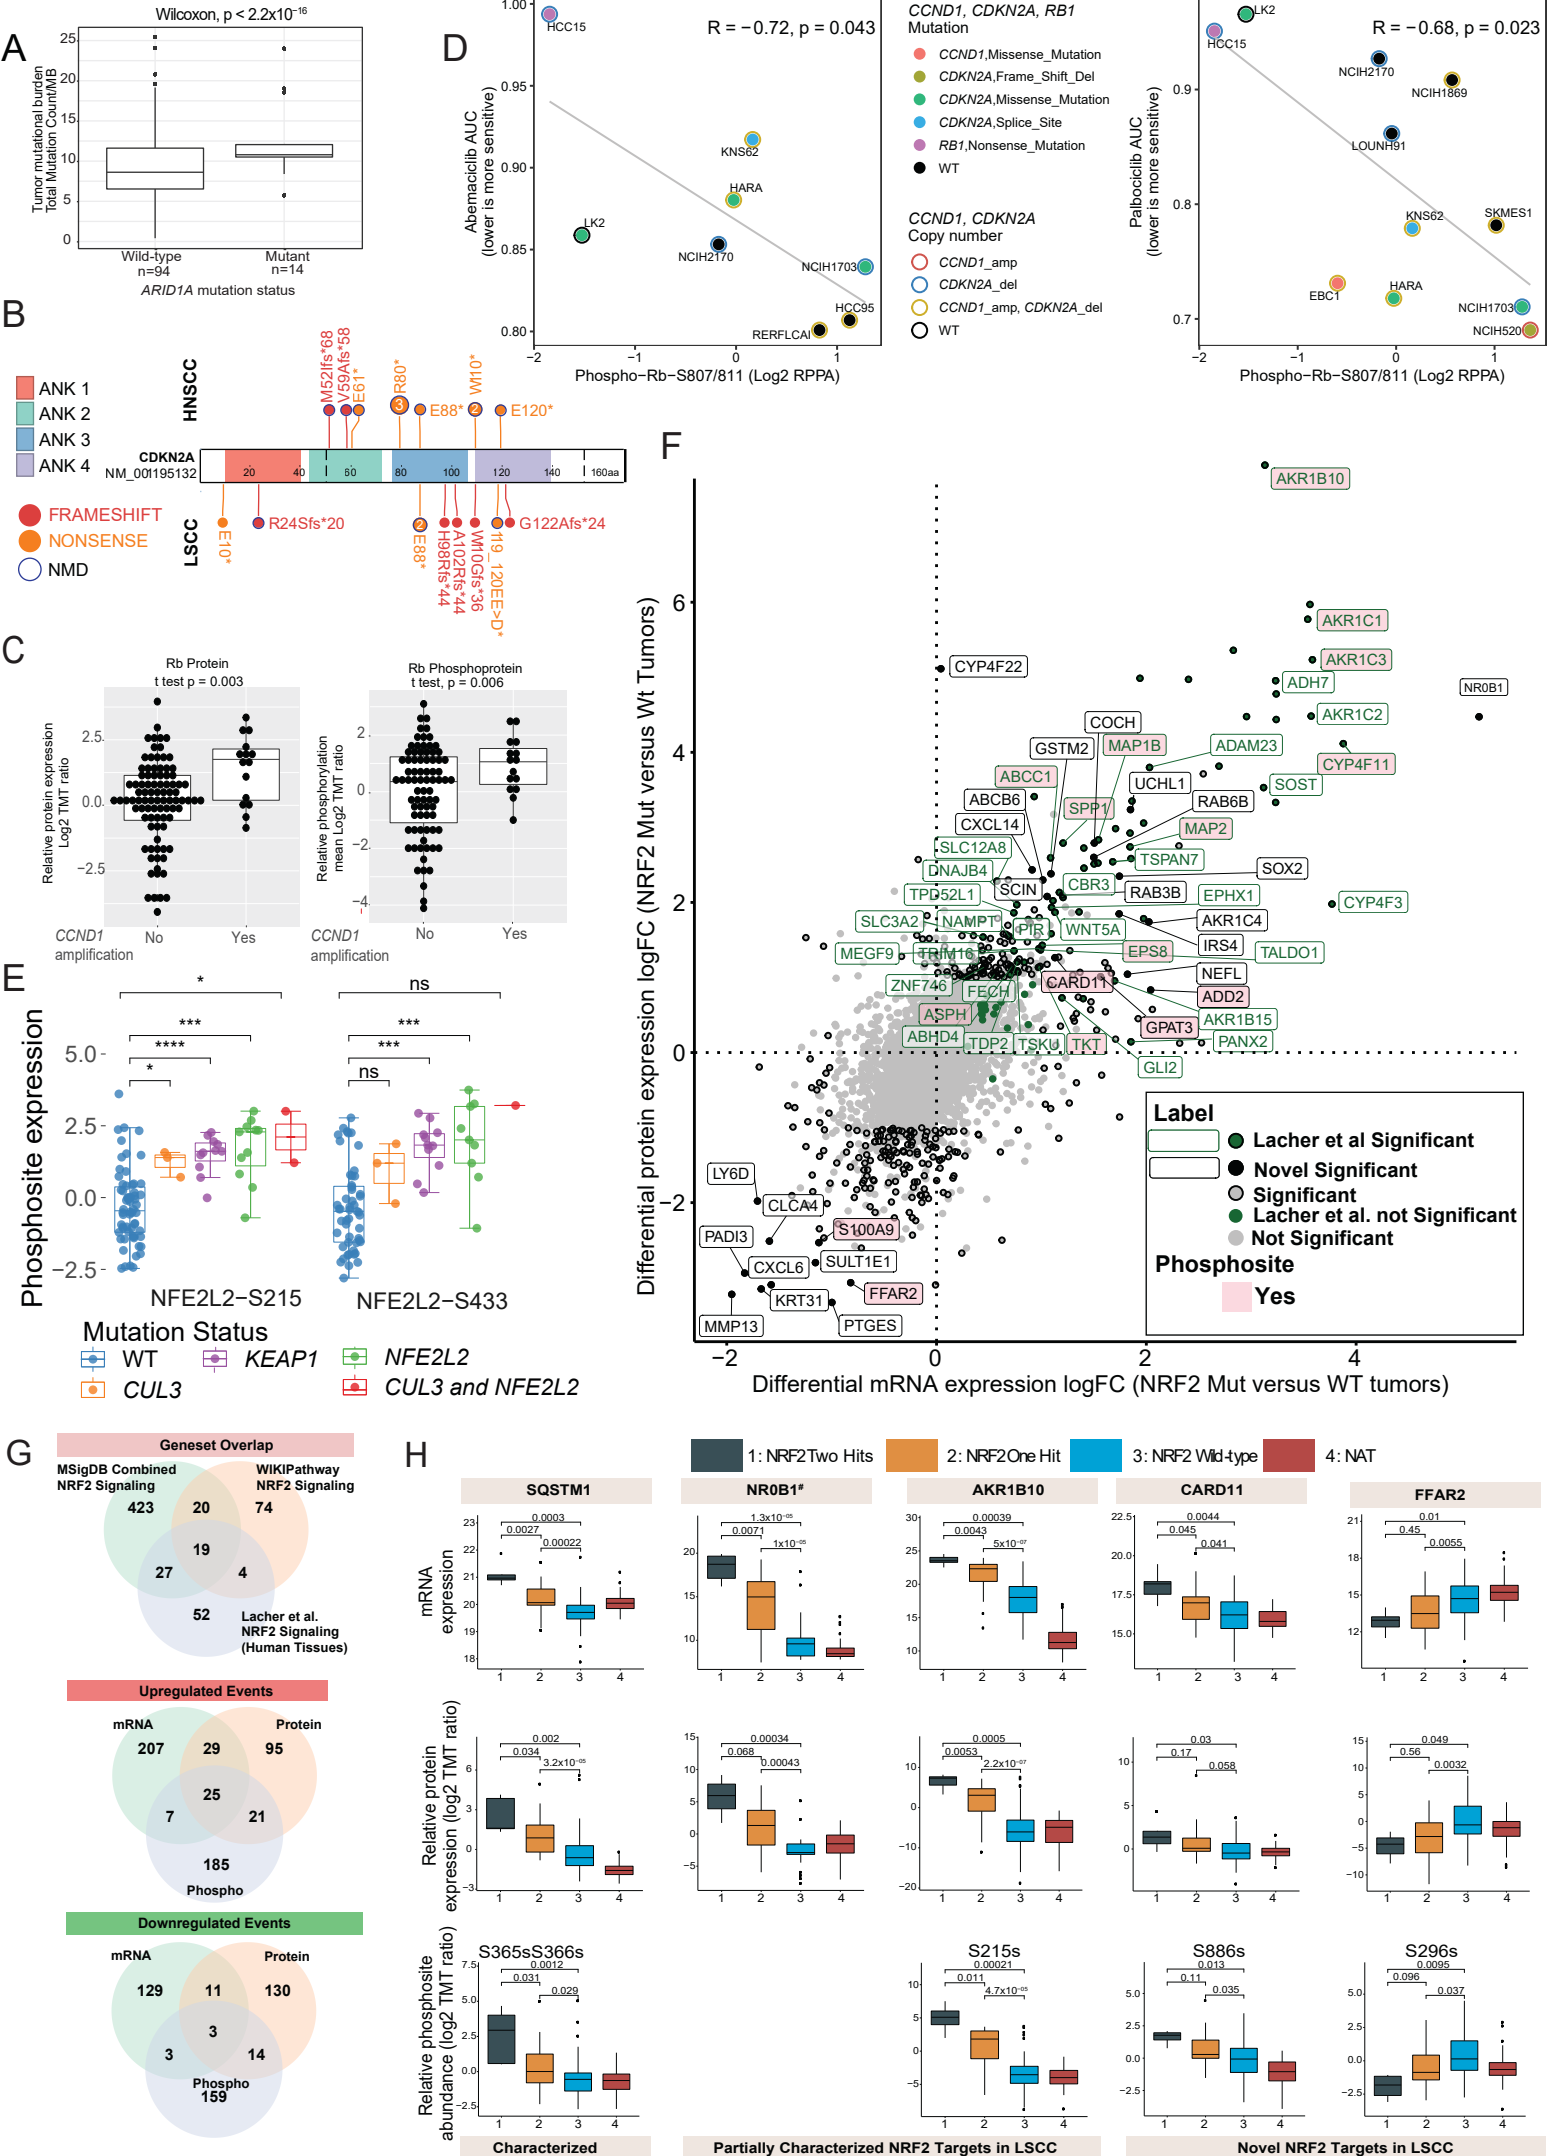

Supplement: NIHMS1730863-supplement-3.pdf [file NIHMS1730863-supplement-3.pdf]

Figure S4

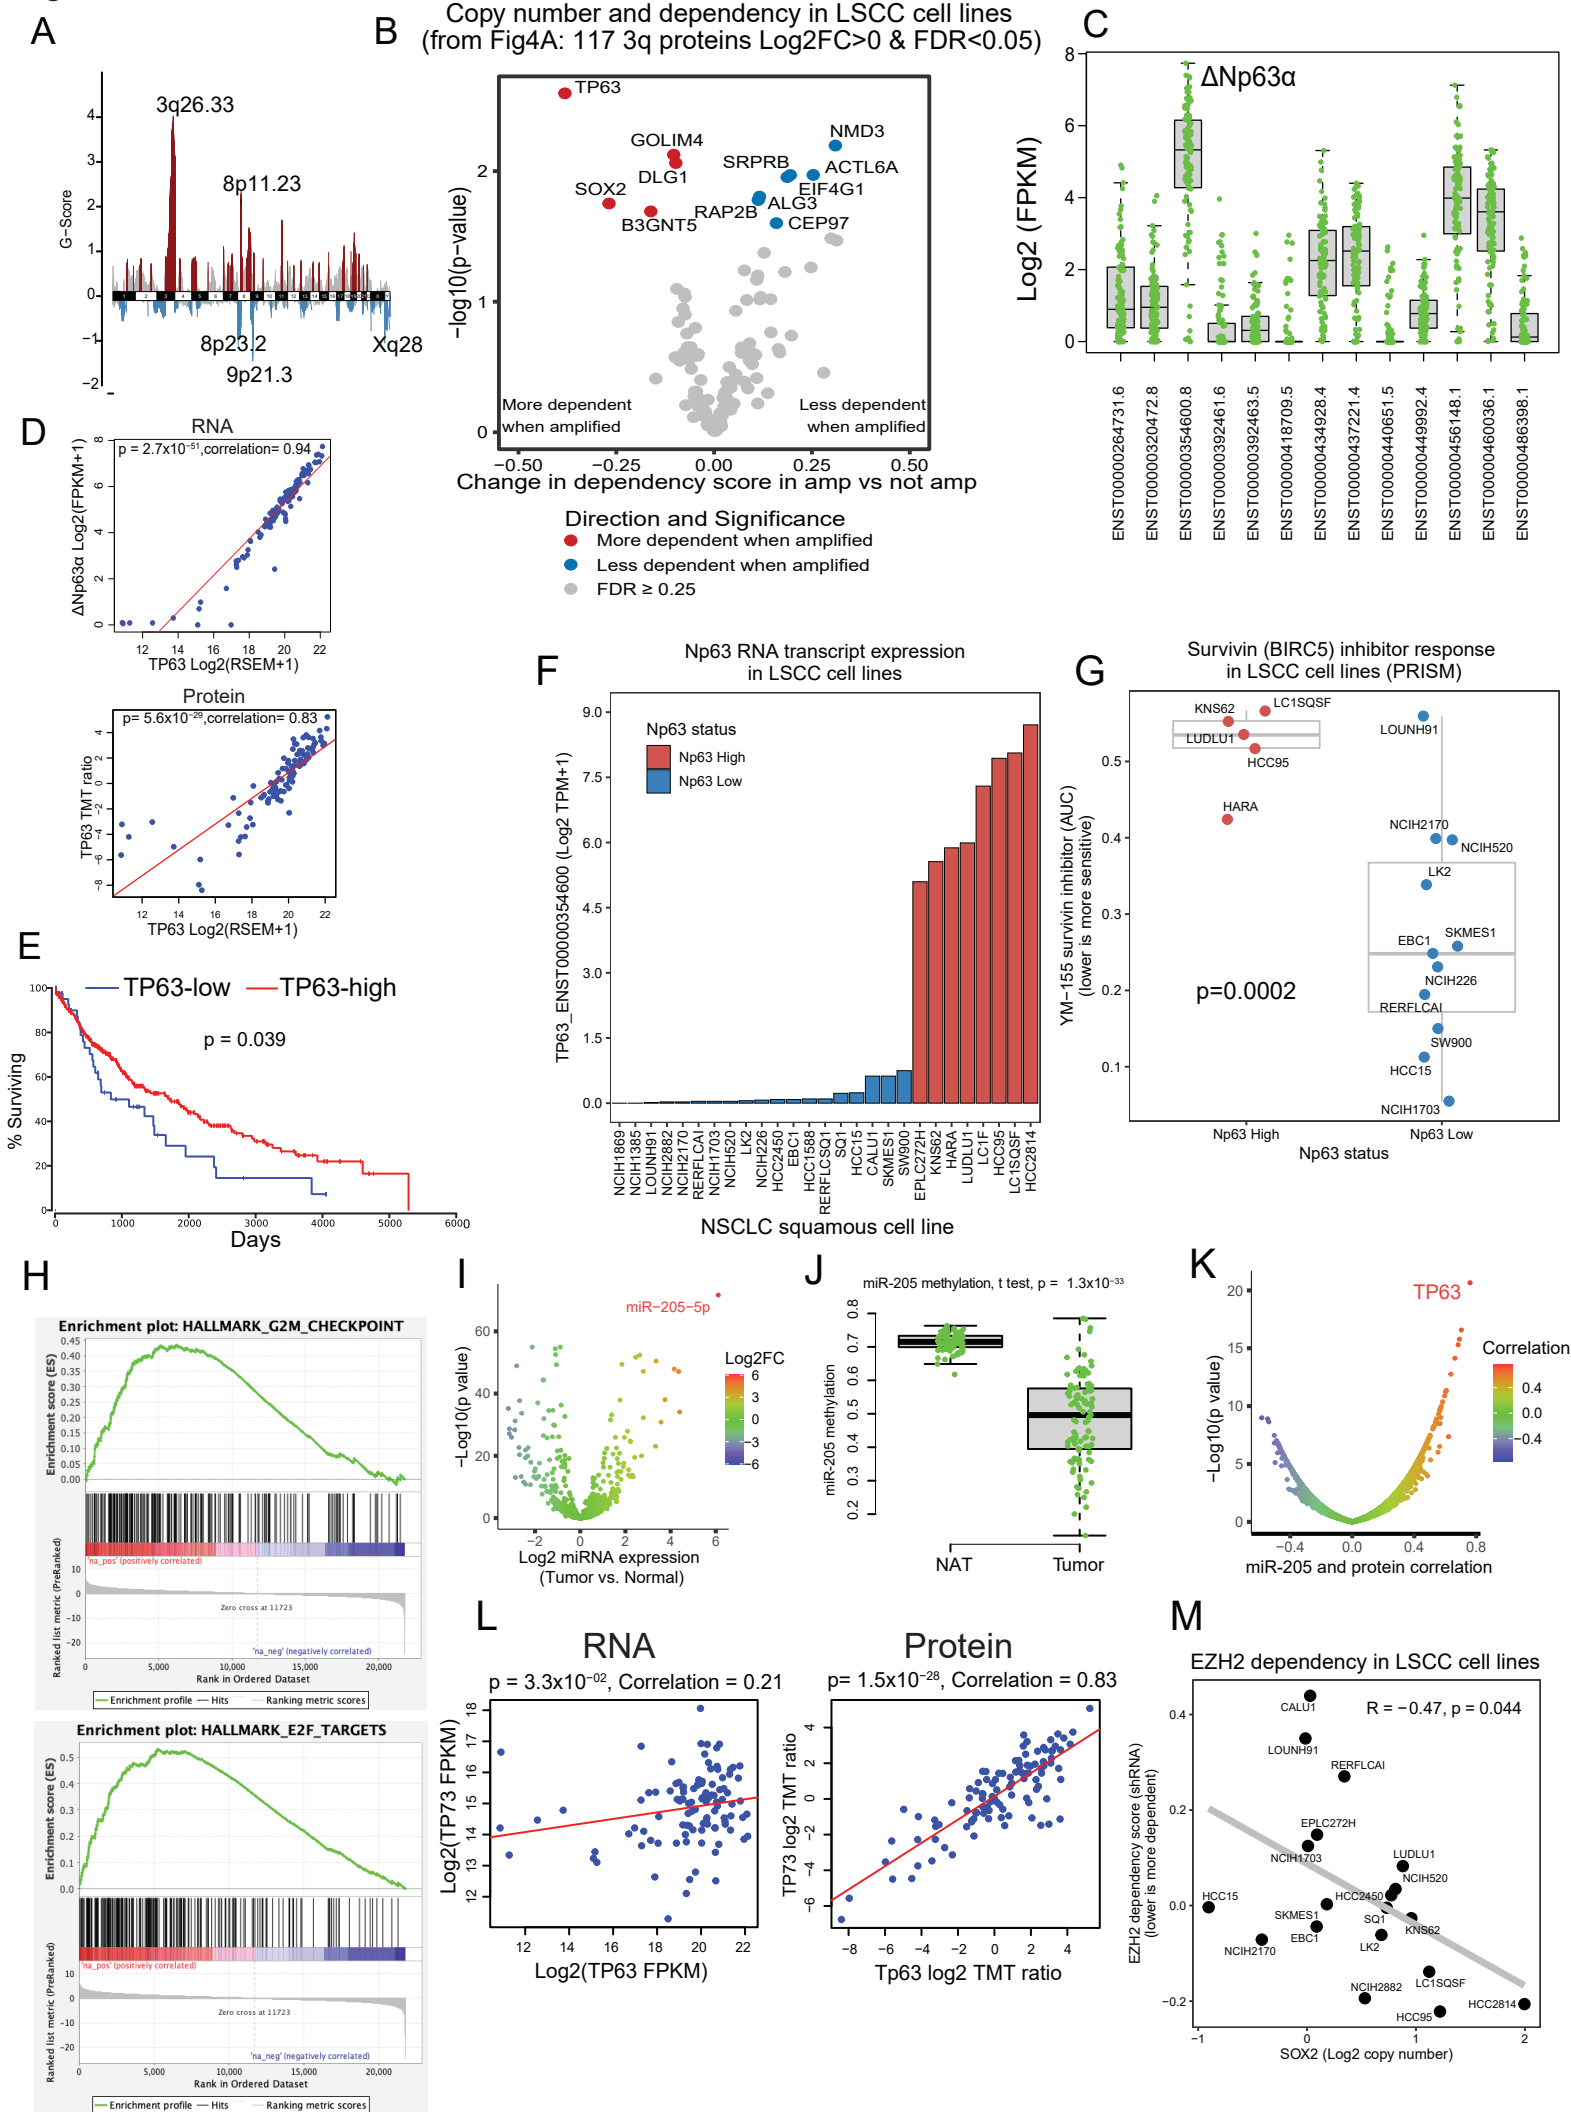

Supplement: NIHMS1730863-supplement-4.pdf [file NIHMS1730863-supplement-4.pdf]

Figure S6

**A Tumors**

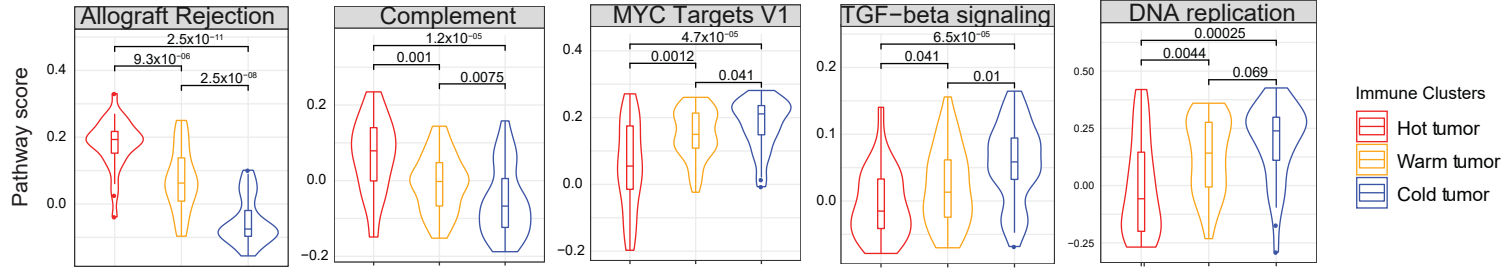

**B NATs**

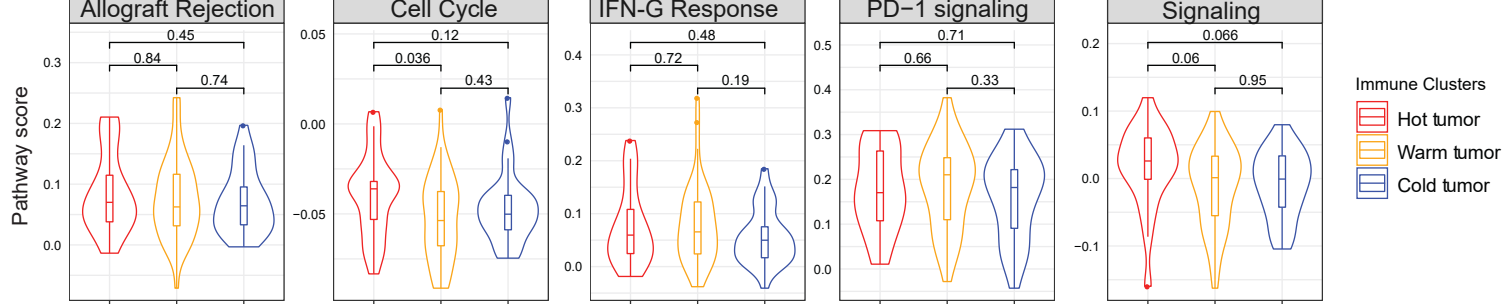

**C IHC result**

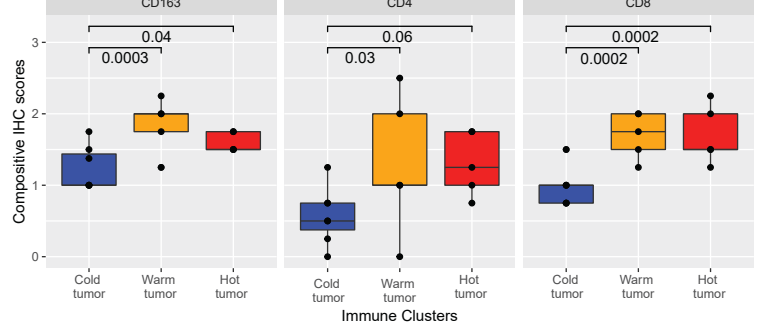

**D**

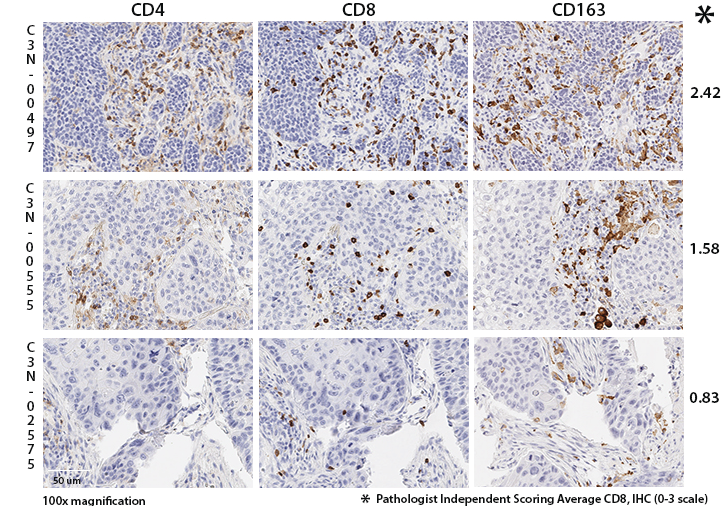

**G**

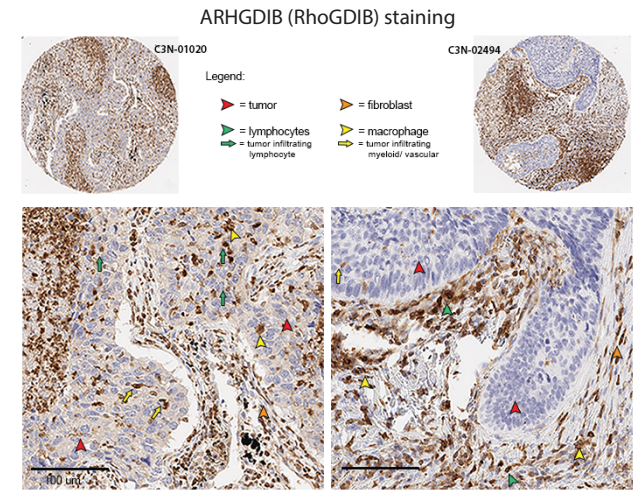

**E**

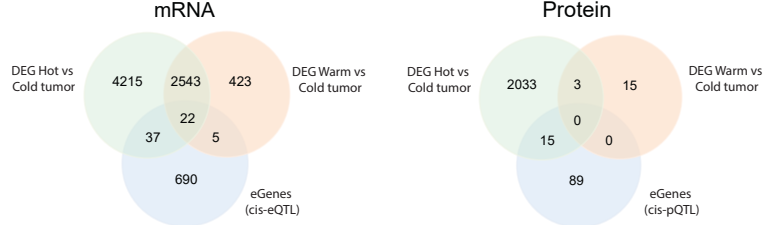

**F**

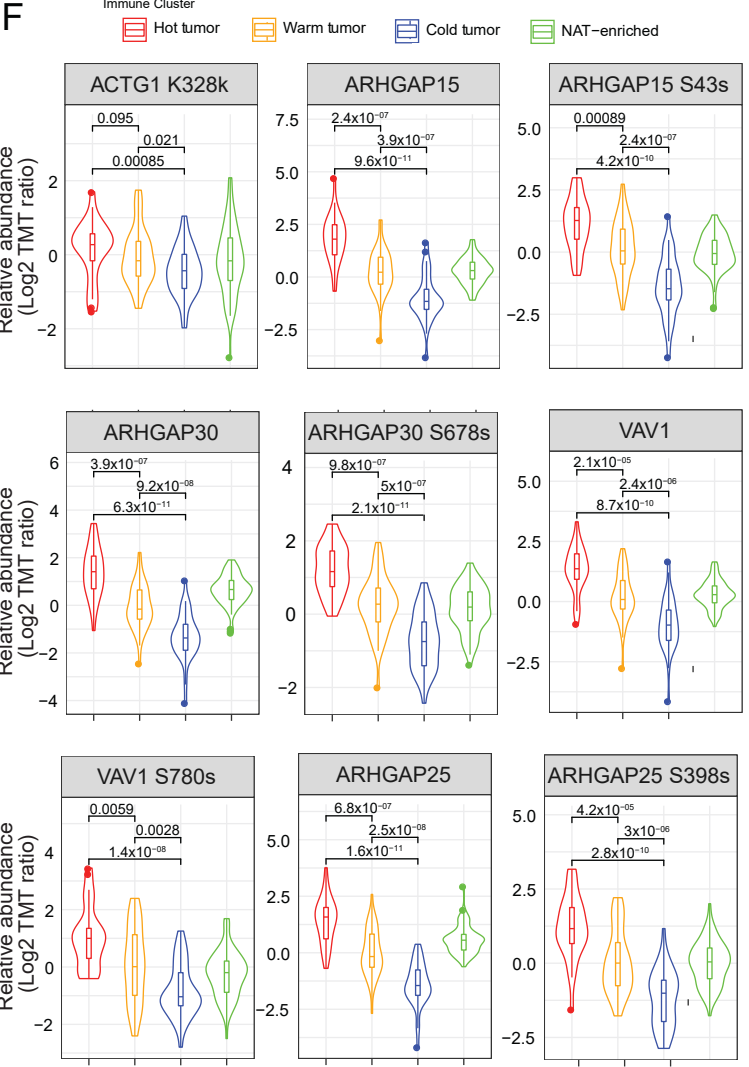

Supplement: NIHMS1730863-supplement-6.pdf [file NIHMS1730863-supplement-6.pdf]

Figure S7

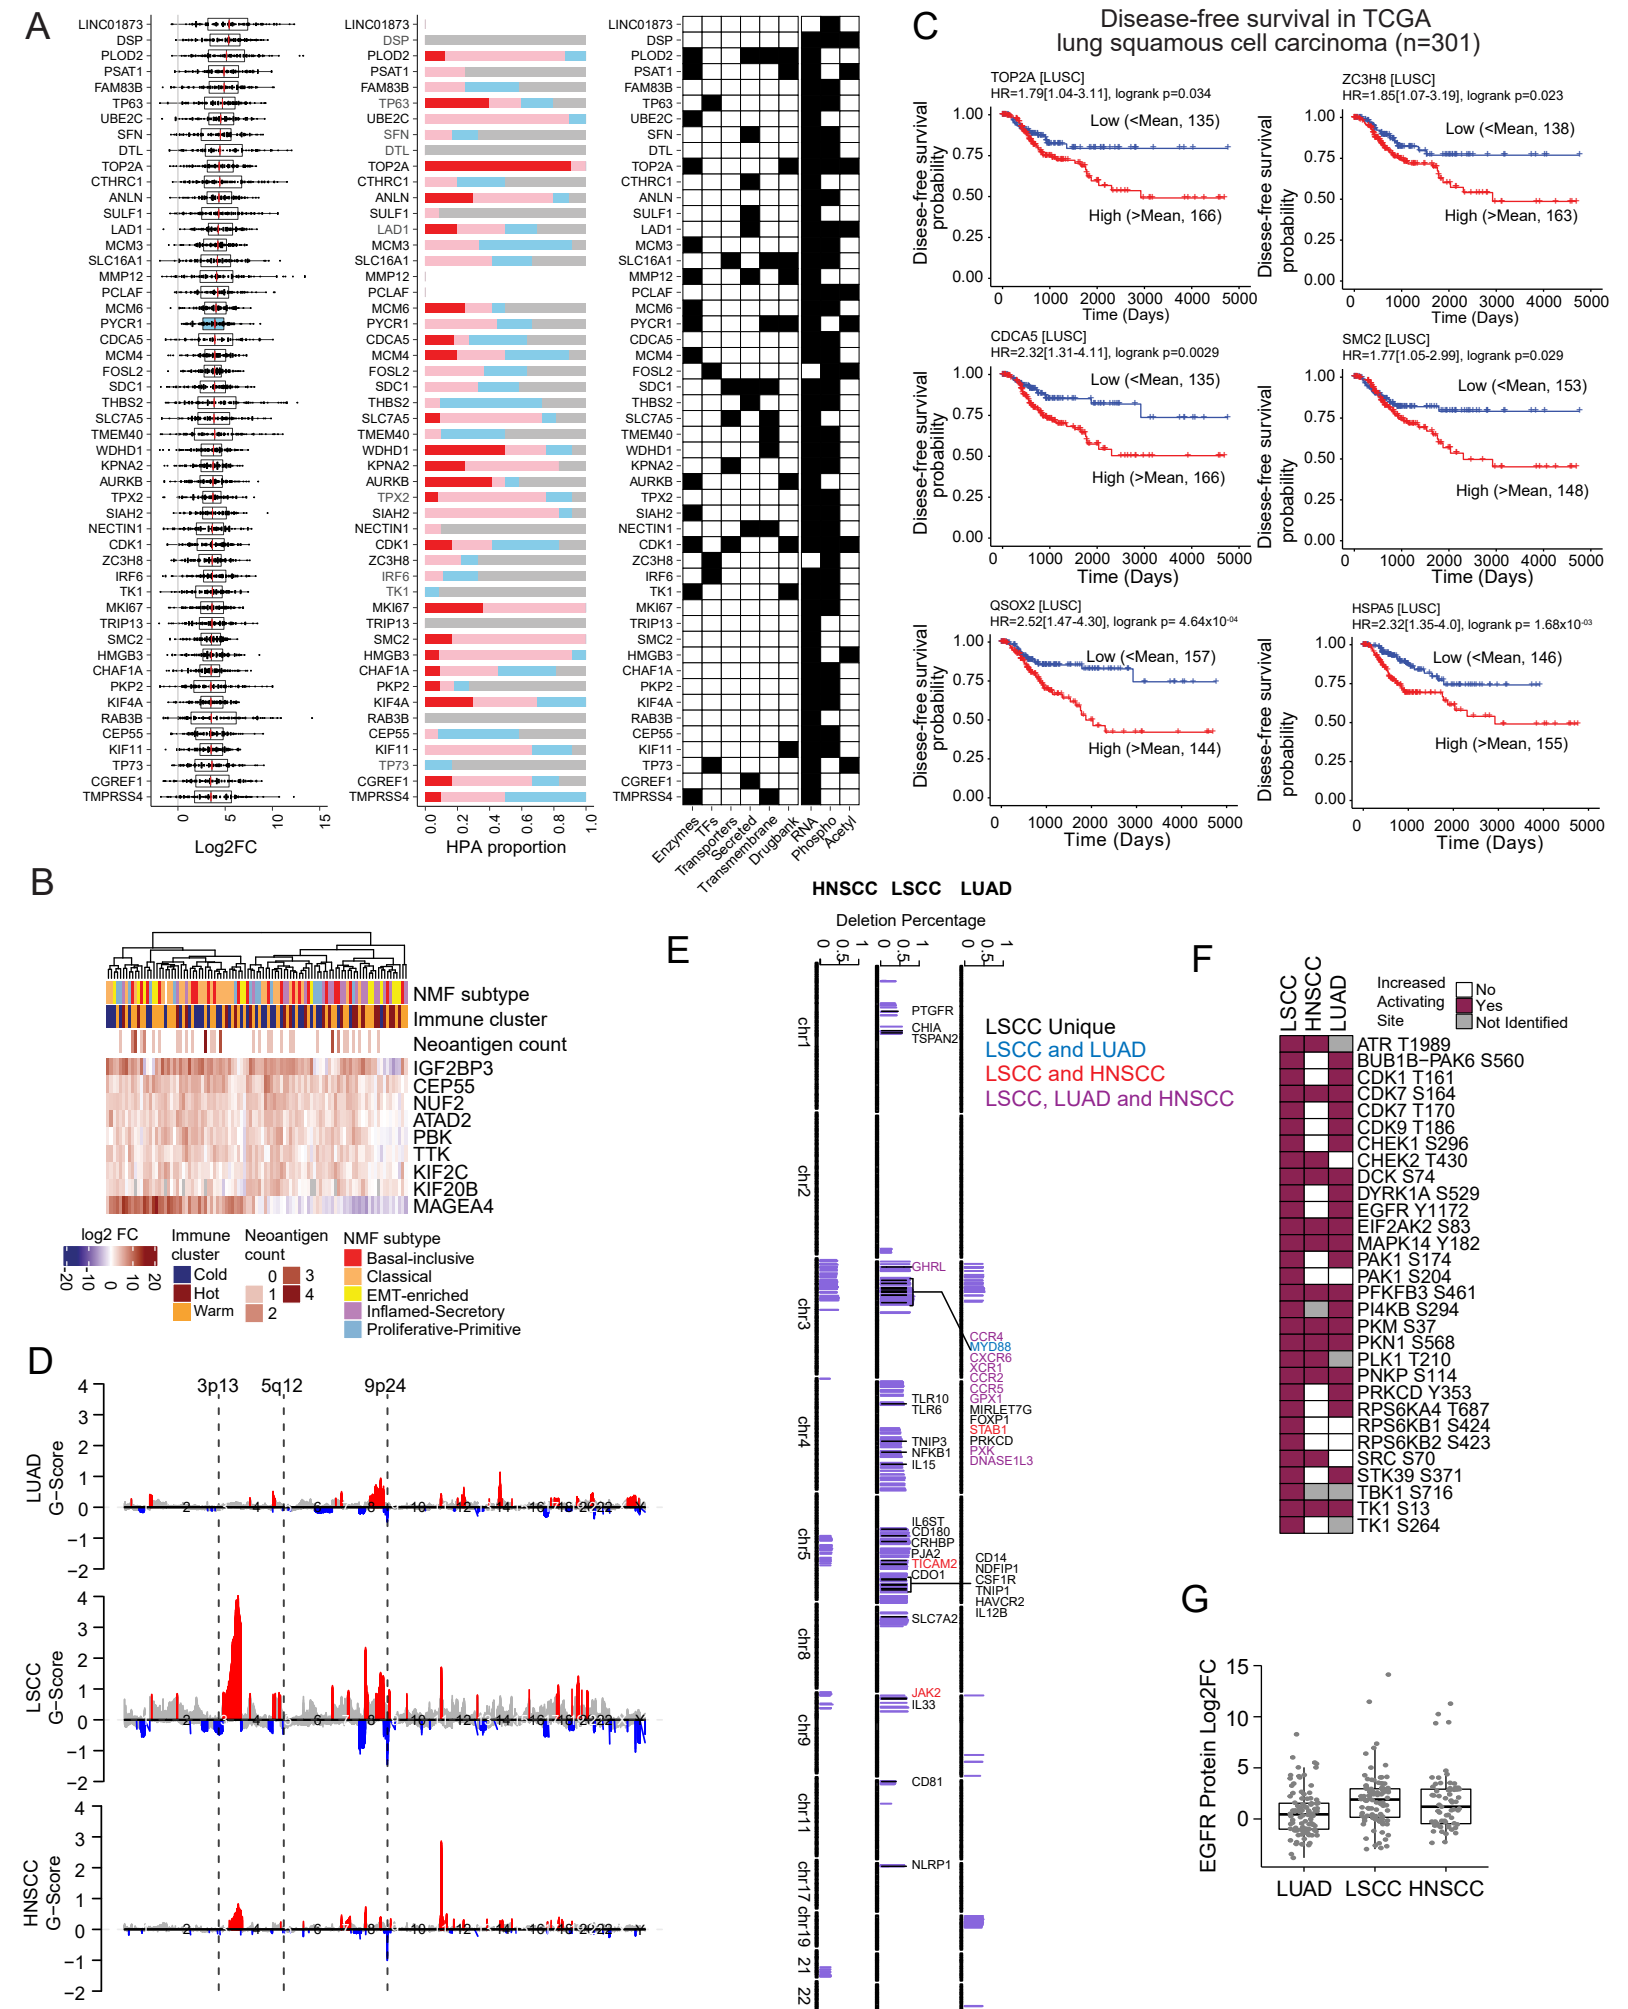

Supplement: NIHMS1730863-supplement-7.pdf [file NIHMS1730863-supplement-7.pdf]

# Figure S5

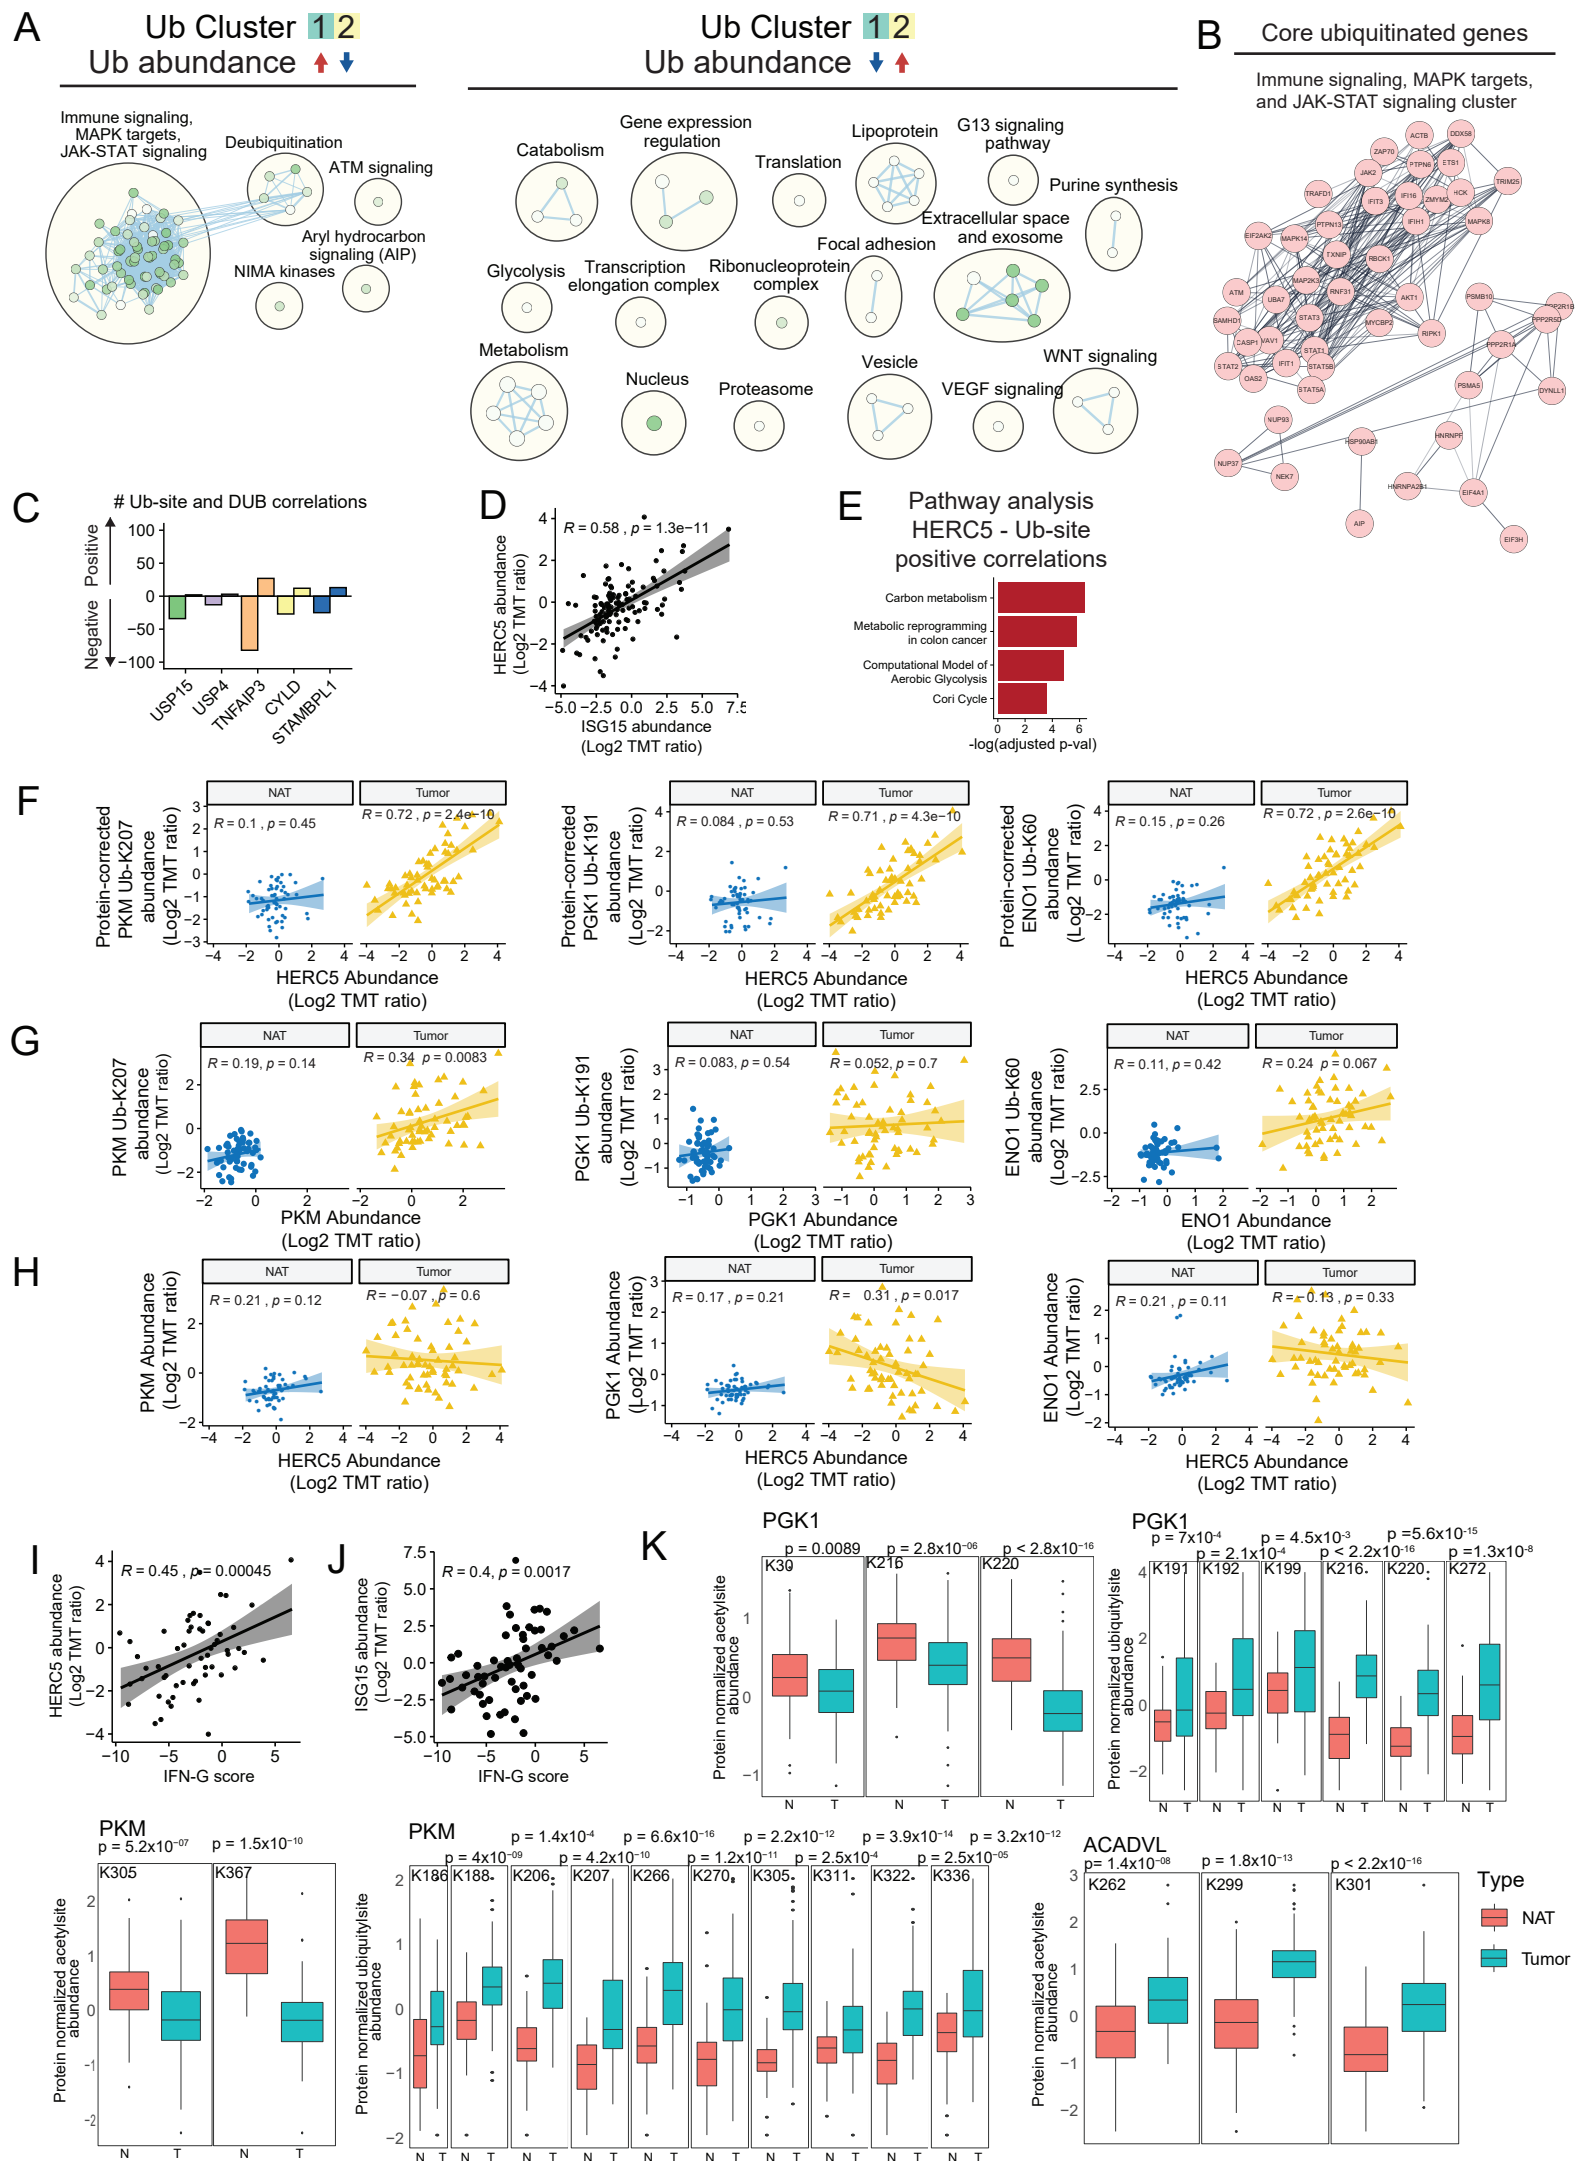

Supplement: NIHMS1730863-supplement-Figure_S5.pdf [file NIHMS1730863-supplement-Figure_S5.pdf]
